# Supplementary material
Source: PubMed Central journal article supplement (PMC5547016)
Supplement: NIHMS834847-supplement-supplement_1.pdf [file NIHMS834847-supplement-supplement_1.pdf]

## Supplemental Table 1

Latency values by group

| Condition(latency;ms) | Control(n=38) ms | Patient(n=69) ms |
|-----------------------|------------------|------------------|
| Duration MMN          | 226.87 ± 33.30   | 200.40 ± 42.54** |
| Frequency MMN         | 142.34 ± 30.98   | 131.66 ± 35.00   |
| Intensity MMN         | 177.50 ± 32.57   | 170.43 ± 35.61   |
